# Supplementary material for: Taking account of uncertainties in digital land suitability assessment
Source: PeerJ journal article supplement (doi:10.7717/peerj.1366), 2015-10-27

# Land suitability assessment inputs for Hazelnuts: Meander Valley, Tasmania

## SOIL DEPTH

1. Probability of soil depth <1.5m and >1.5m most likely outcome.

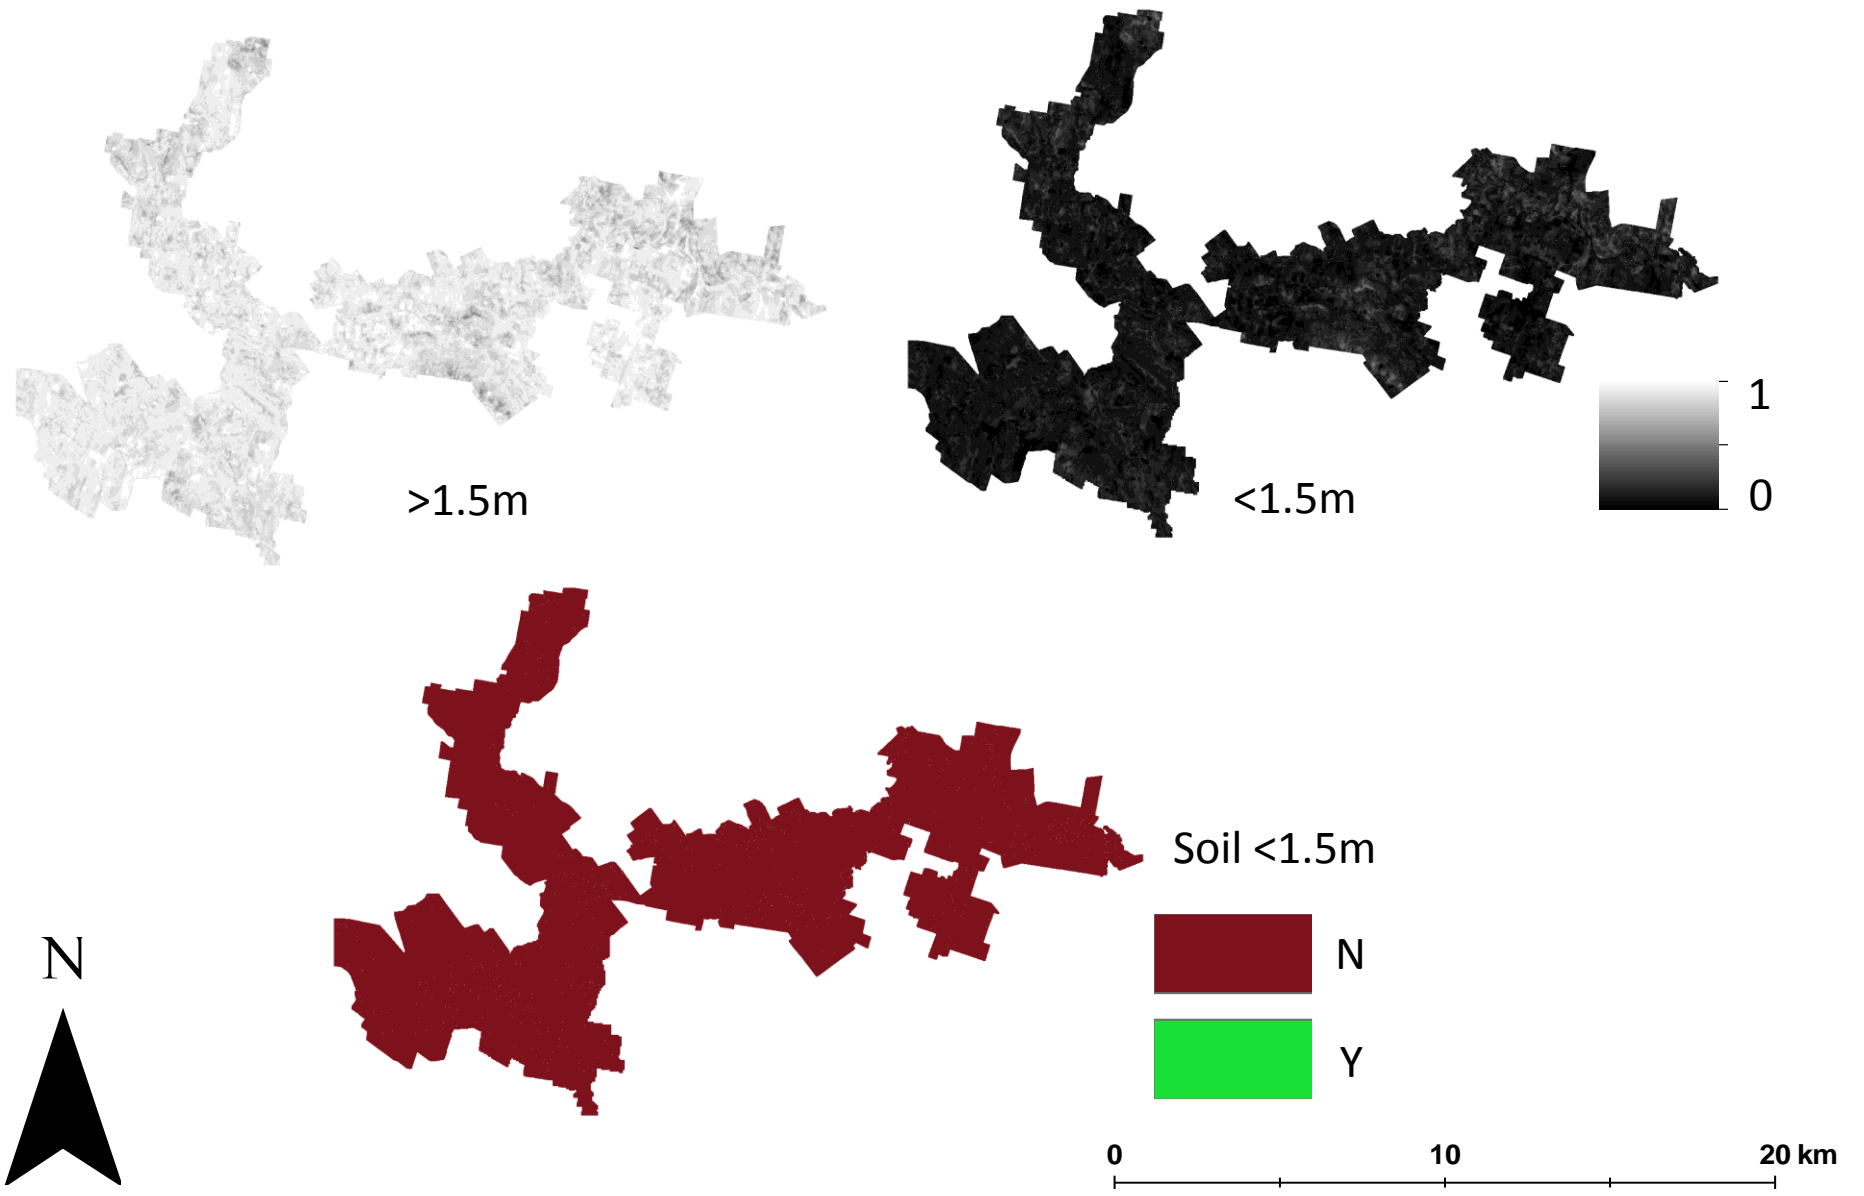

Land suitability assessment inputs for Hazelnuts: Meander Valley, Tasmania  
**SOIL DEPTH and 90% upper and lower prediction limits**

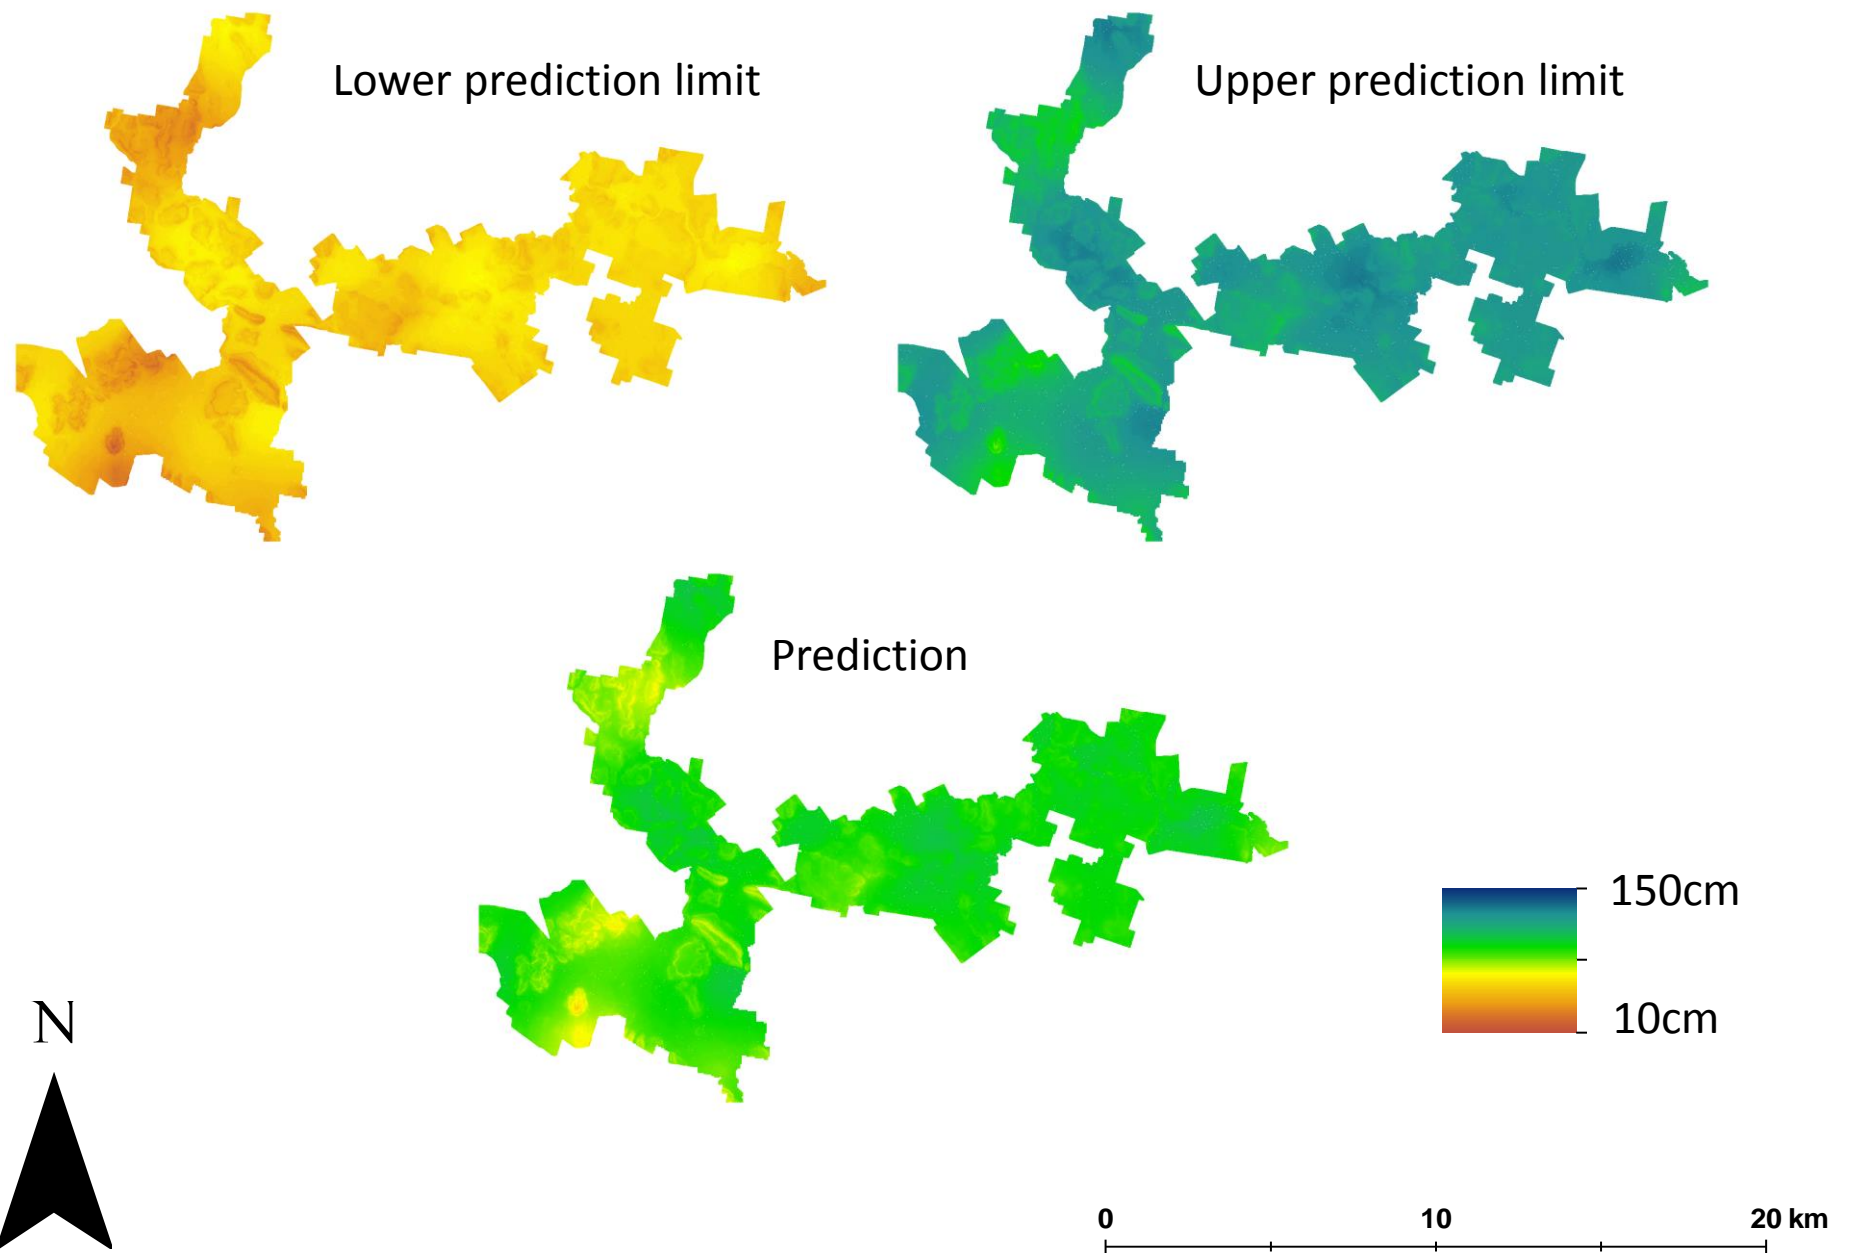

Land suitability assessment inputs for Hazelnuts: Meander Valley, Tasmania  
**SOIL pH (1:5 soil:water) top 15cm**

Lower prediction limit

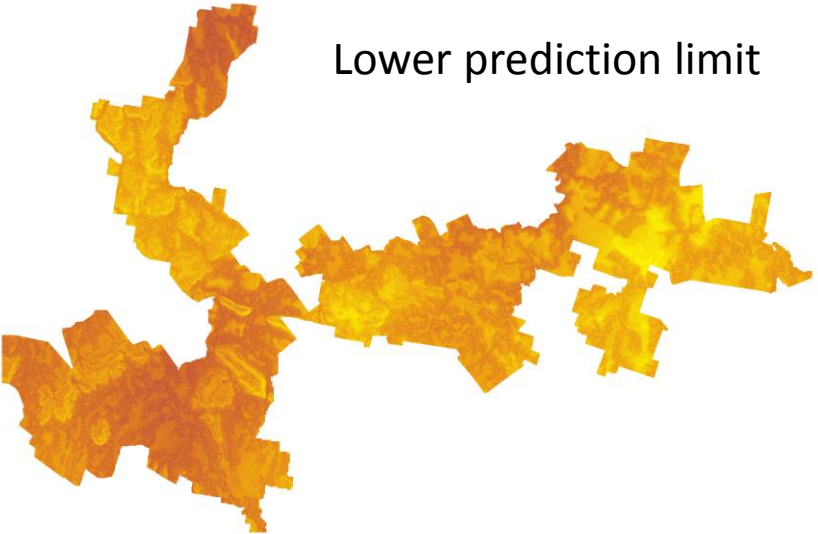

Upper prediction limit

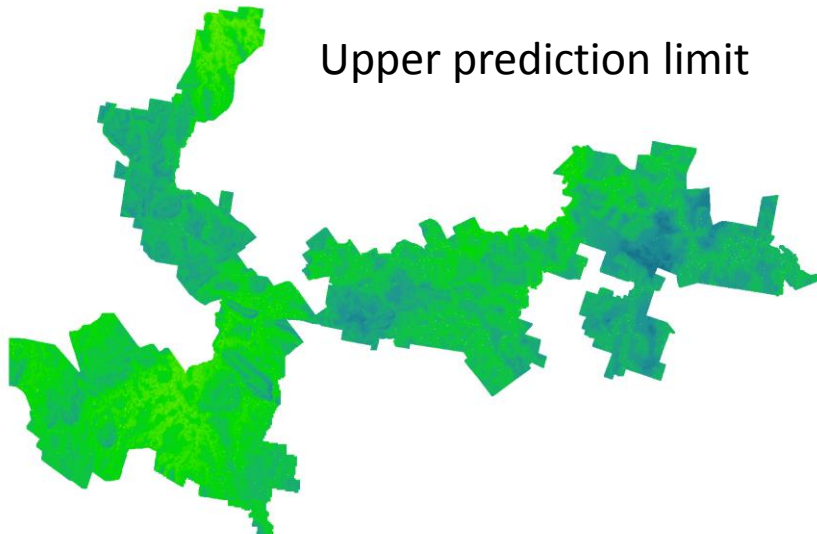

Prediction

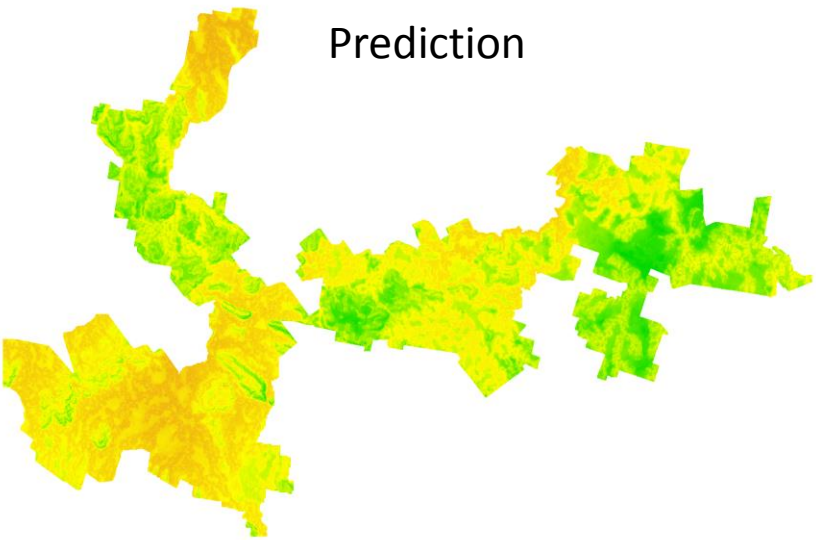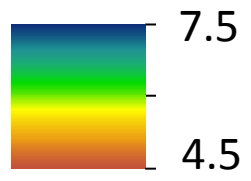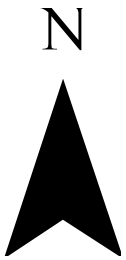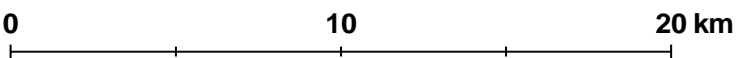

# Land suitability assessment inputs for Hazelnuts: Meander Valley, Tasmania

## SOIL EC (dS/m) top 15cm

Lower prediction limit

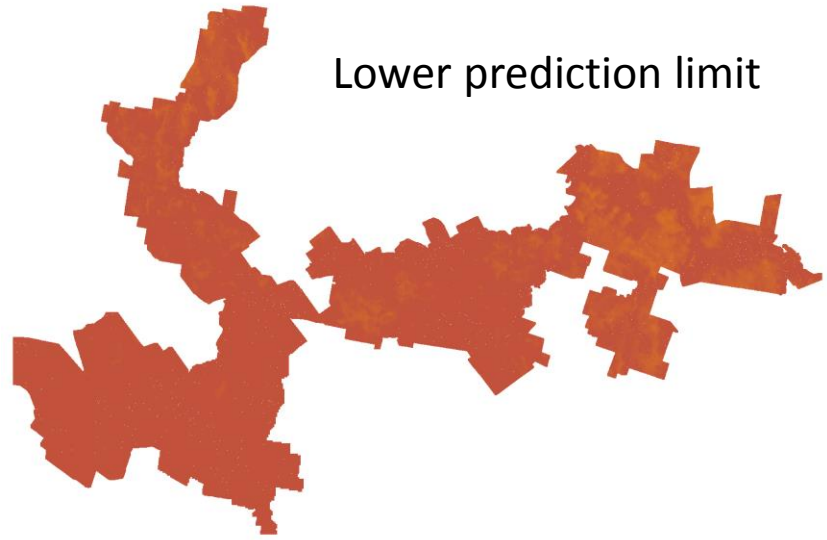

Upper prediction limit

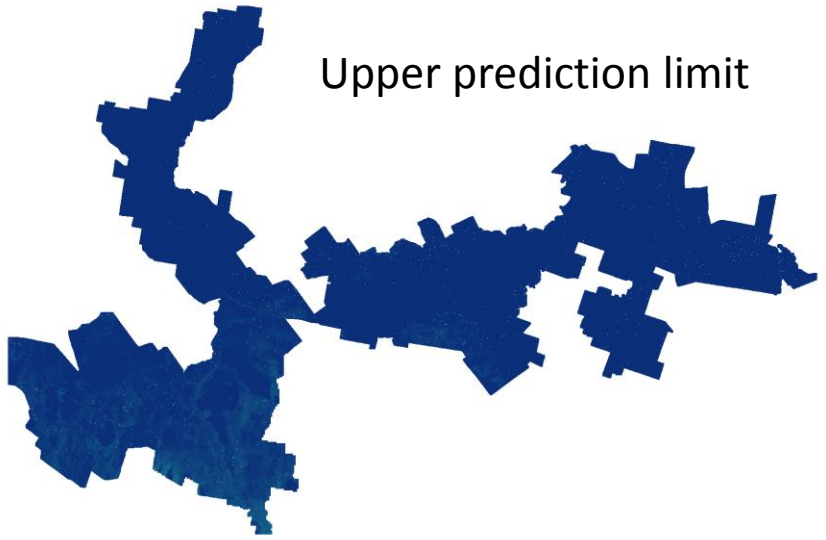

Prediction

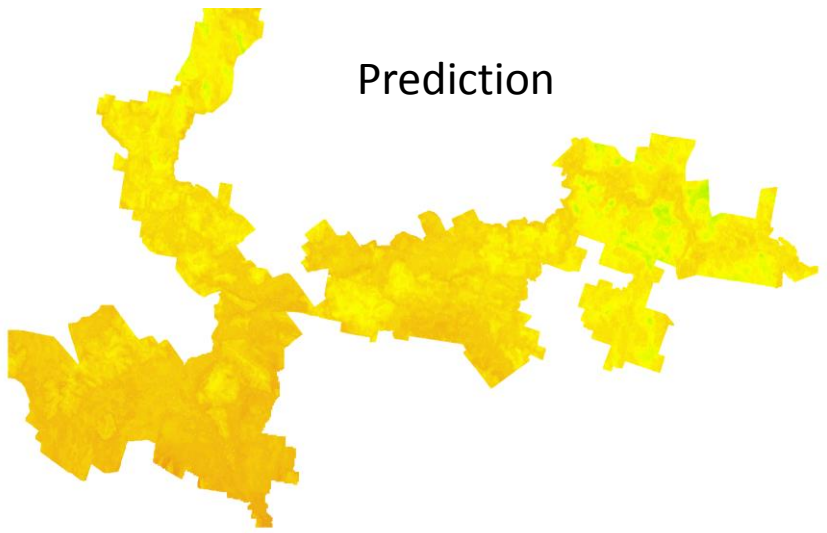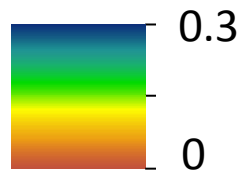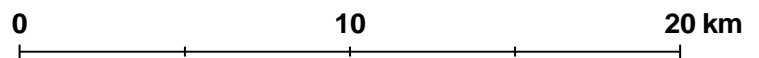

# Land suitability assessment inputs for Hazelnuts: Meander Valley, Tasmania

## SOIL Texture (clay %) top 15cm

Lower prediction limit

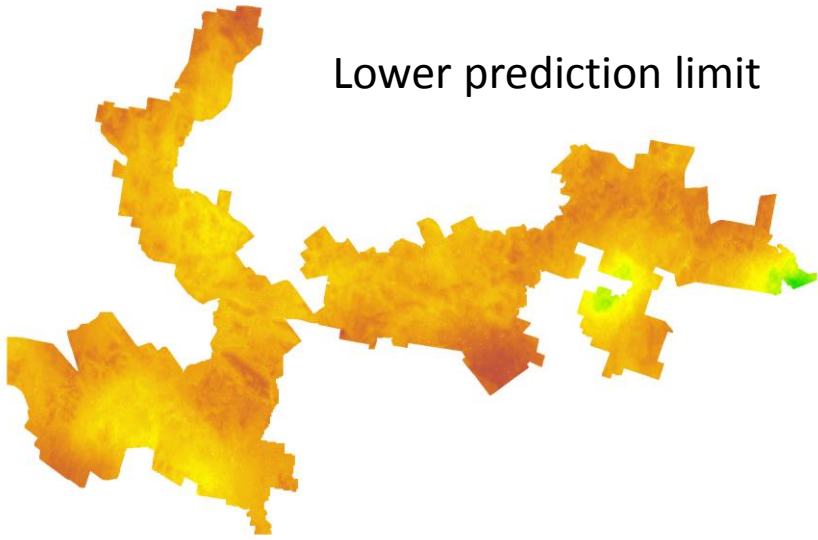

Upper prediction limit

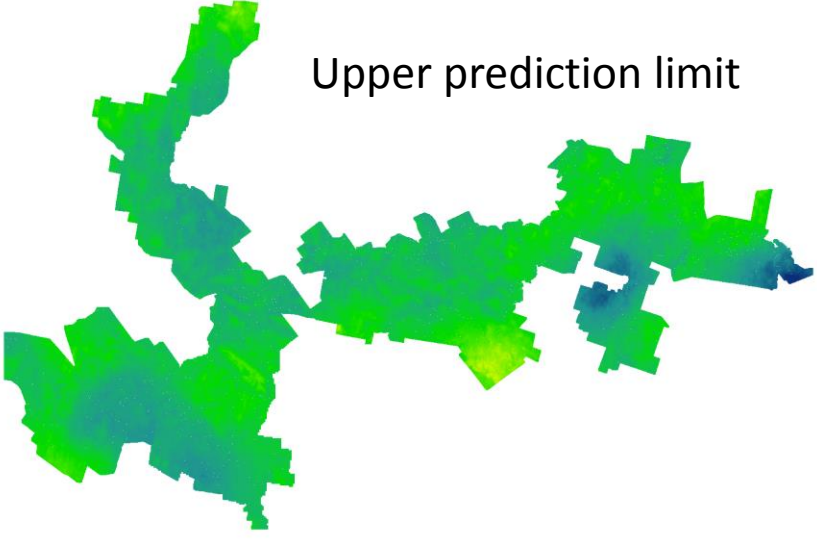

Prediction

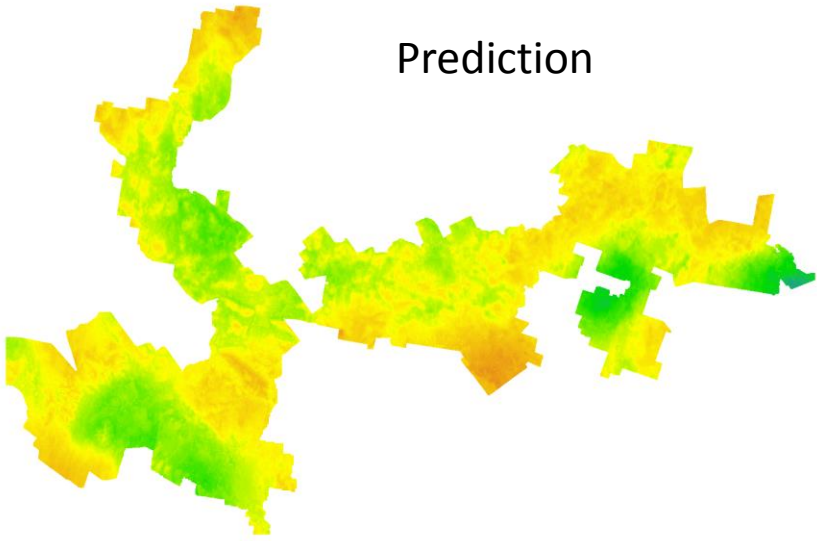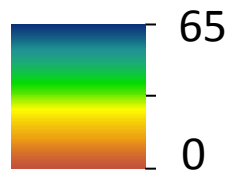



Land suitability assessment inputs for Hazelnuts: Meander Valley, Tasmania  
**SOIL Drainage (continuous index) 1 = Very poorly drained, 6 = Rapidly drained**

Lower prediction limit

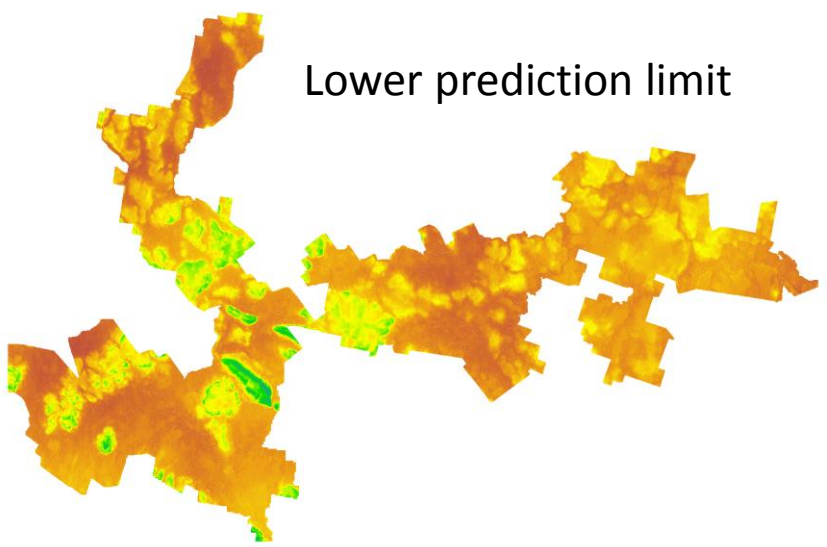

Upper prediction limit

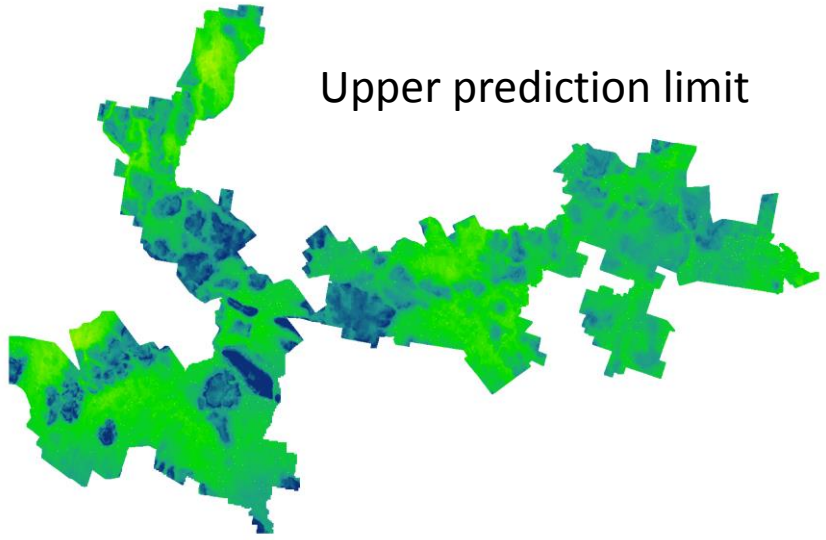

Prediction

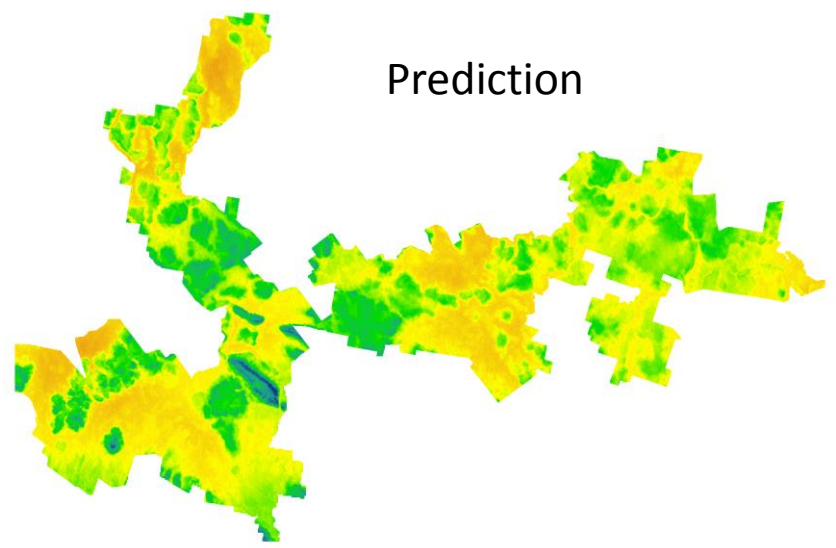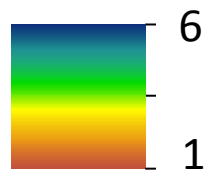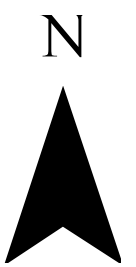

Land suitability assessment inputs for Hazelnuts: Meander Valley, Tasmania  
**SOIL Stoniness: Presence or absence of rock fragments to 15cm (probability and most likely outcome)**

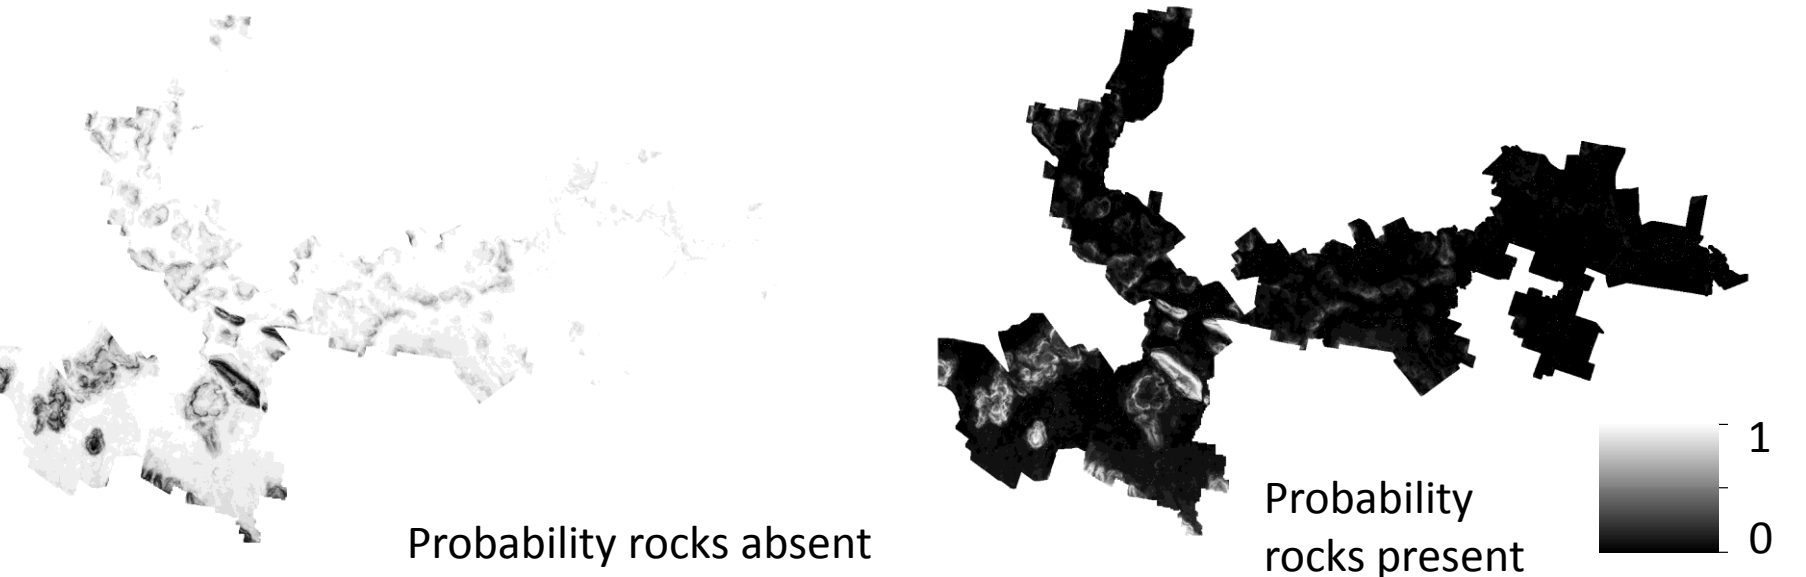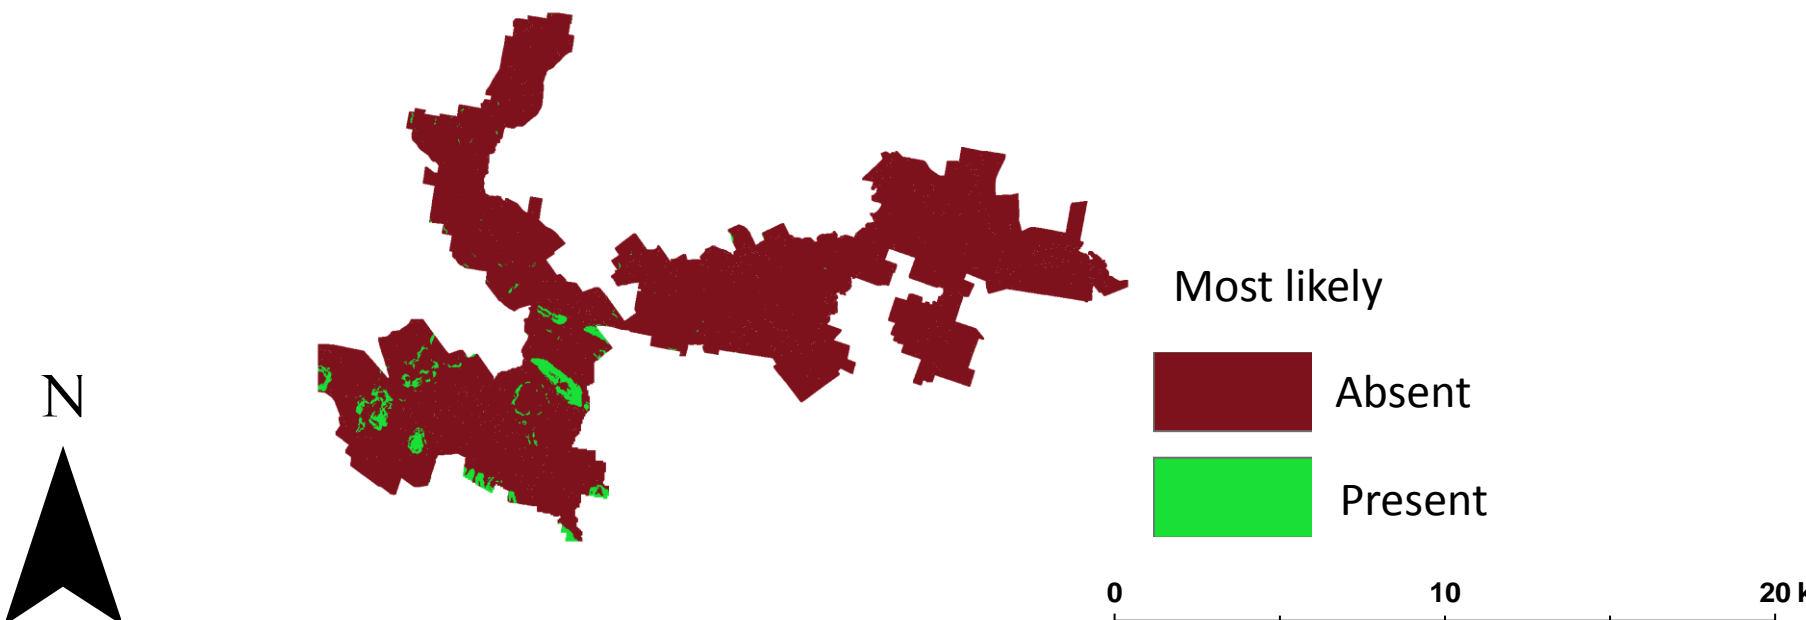

# Land suitability assessment inputs for Hazelnuts: Meander Valley, Tasmania

## SOIL Stoniness: Ordinal stoniness class (most likely) with probabilities

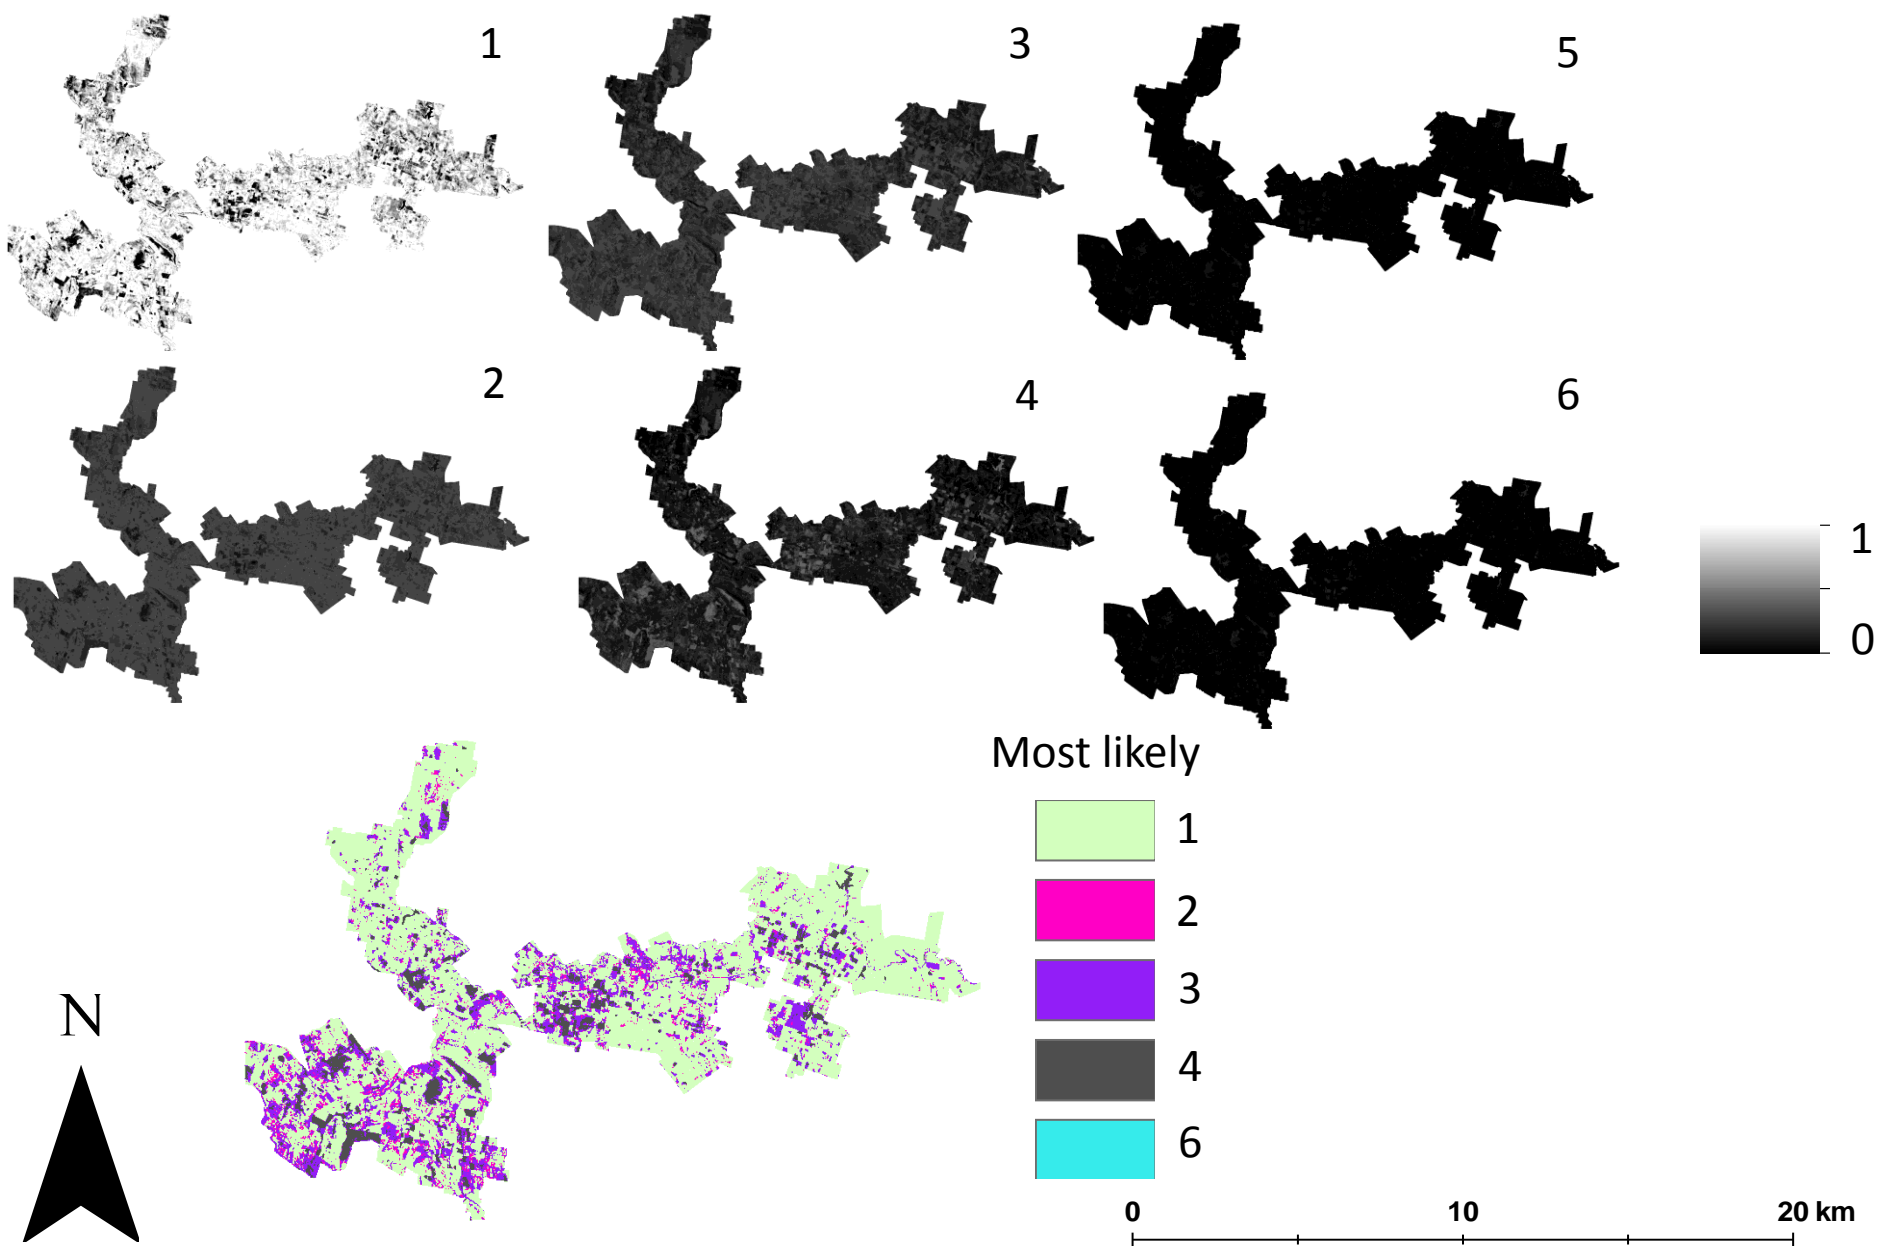



# Land suitability assessment inputs for Hazelnuts: Meander Valley, Tasmania

## Incidence of frost occurrence. Likely or unlikely to occur

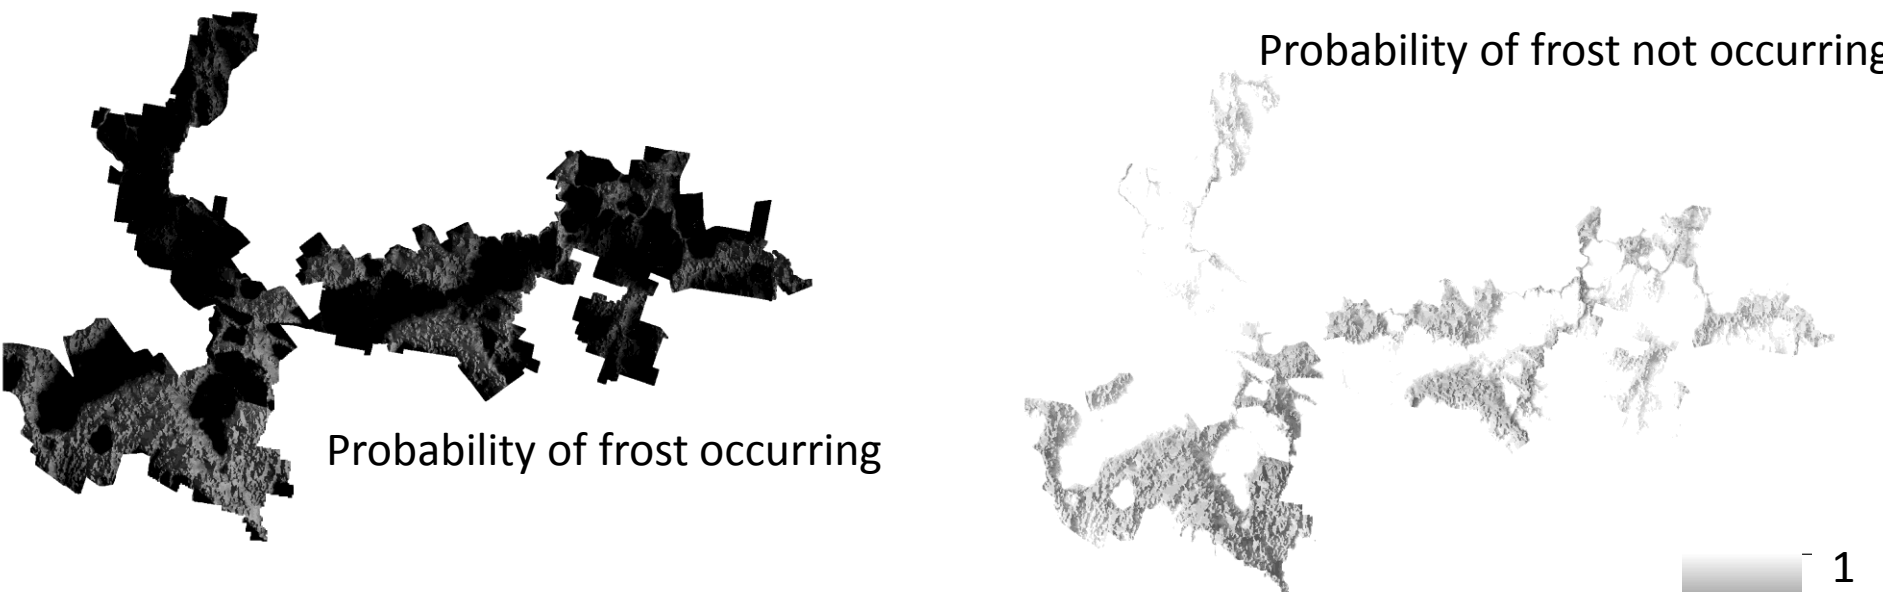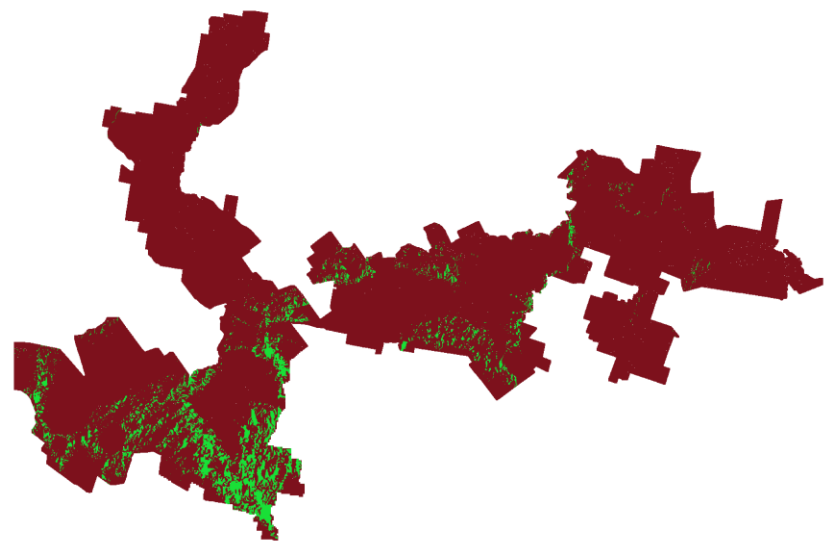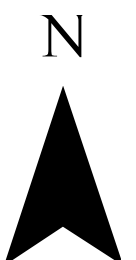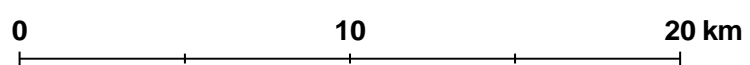

Land suitability assessment inputs for Hazelnuts: Meander Valley, Tasmania  
Incidence of frost occurrence. Likelihood of not occurring (%)

Lower prediction limit

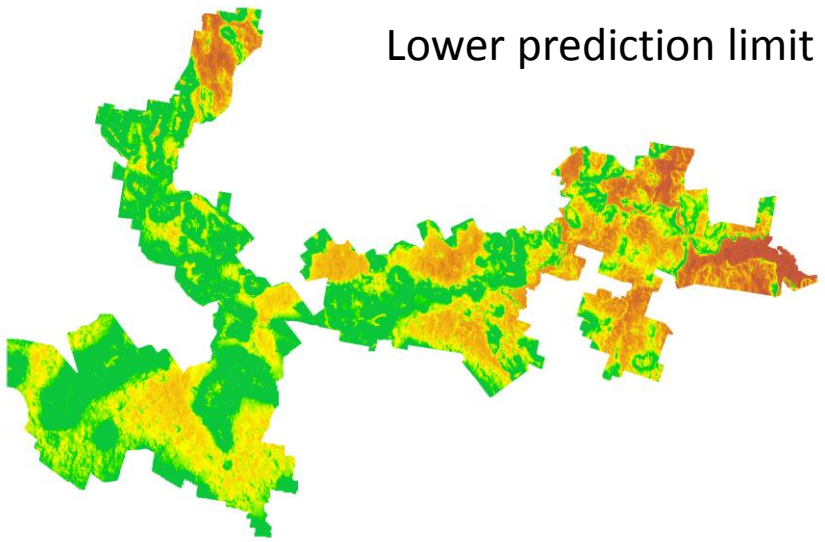

Upper prediction limit

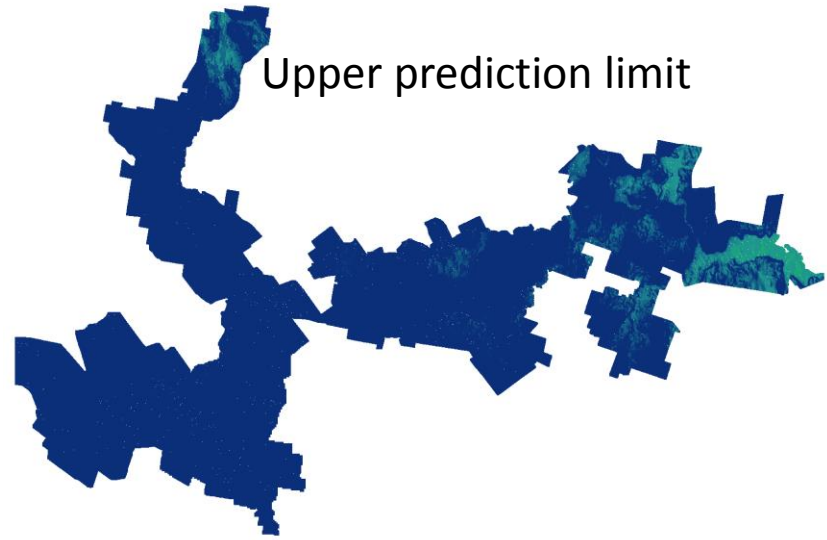

Prediction

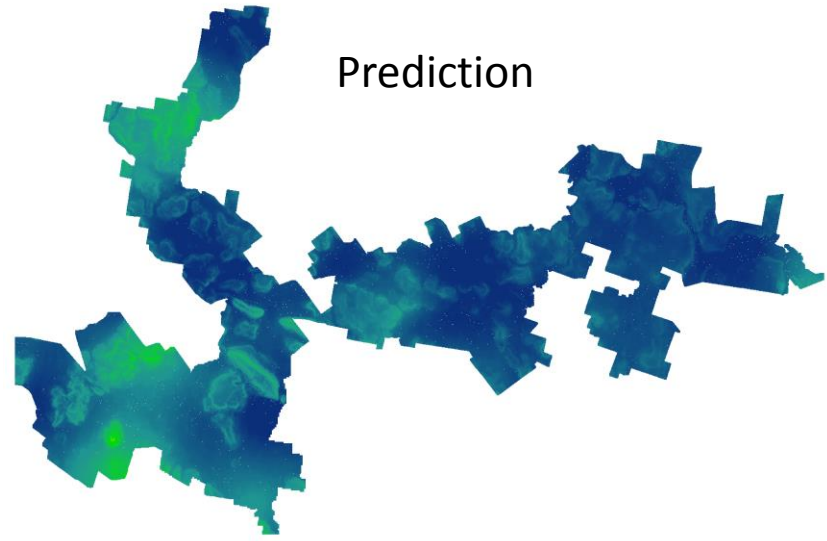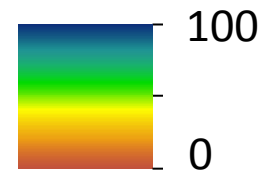

Land suitability assessment inputs for Hazelnuts: Meander Valley, Tasmania

Temperature (mean max monthly temp January, February)

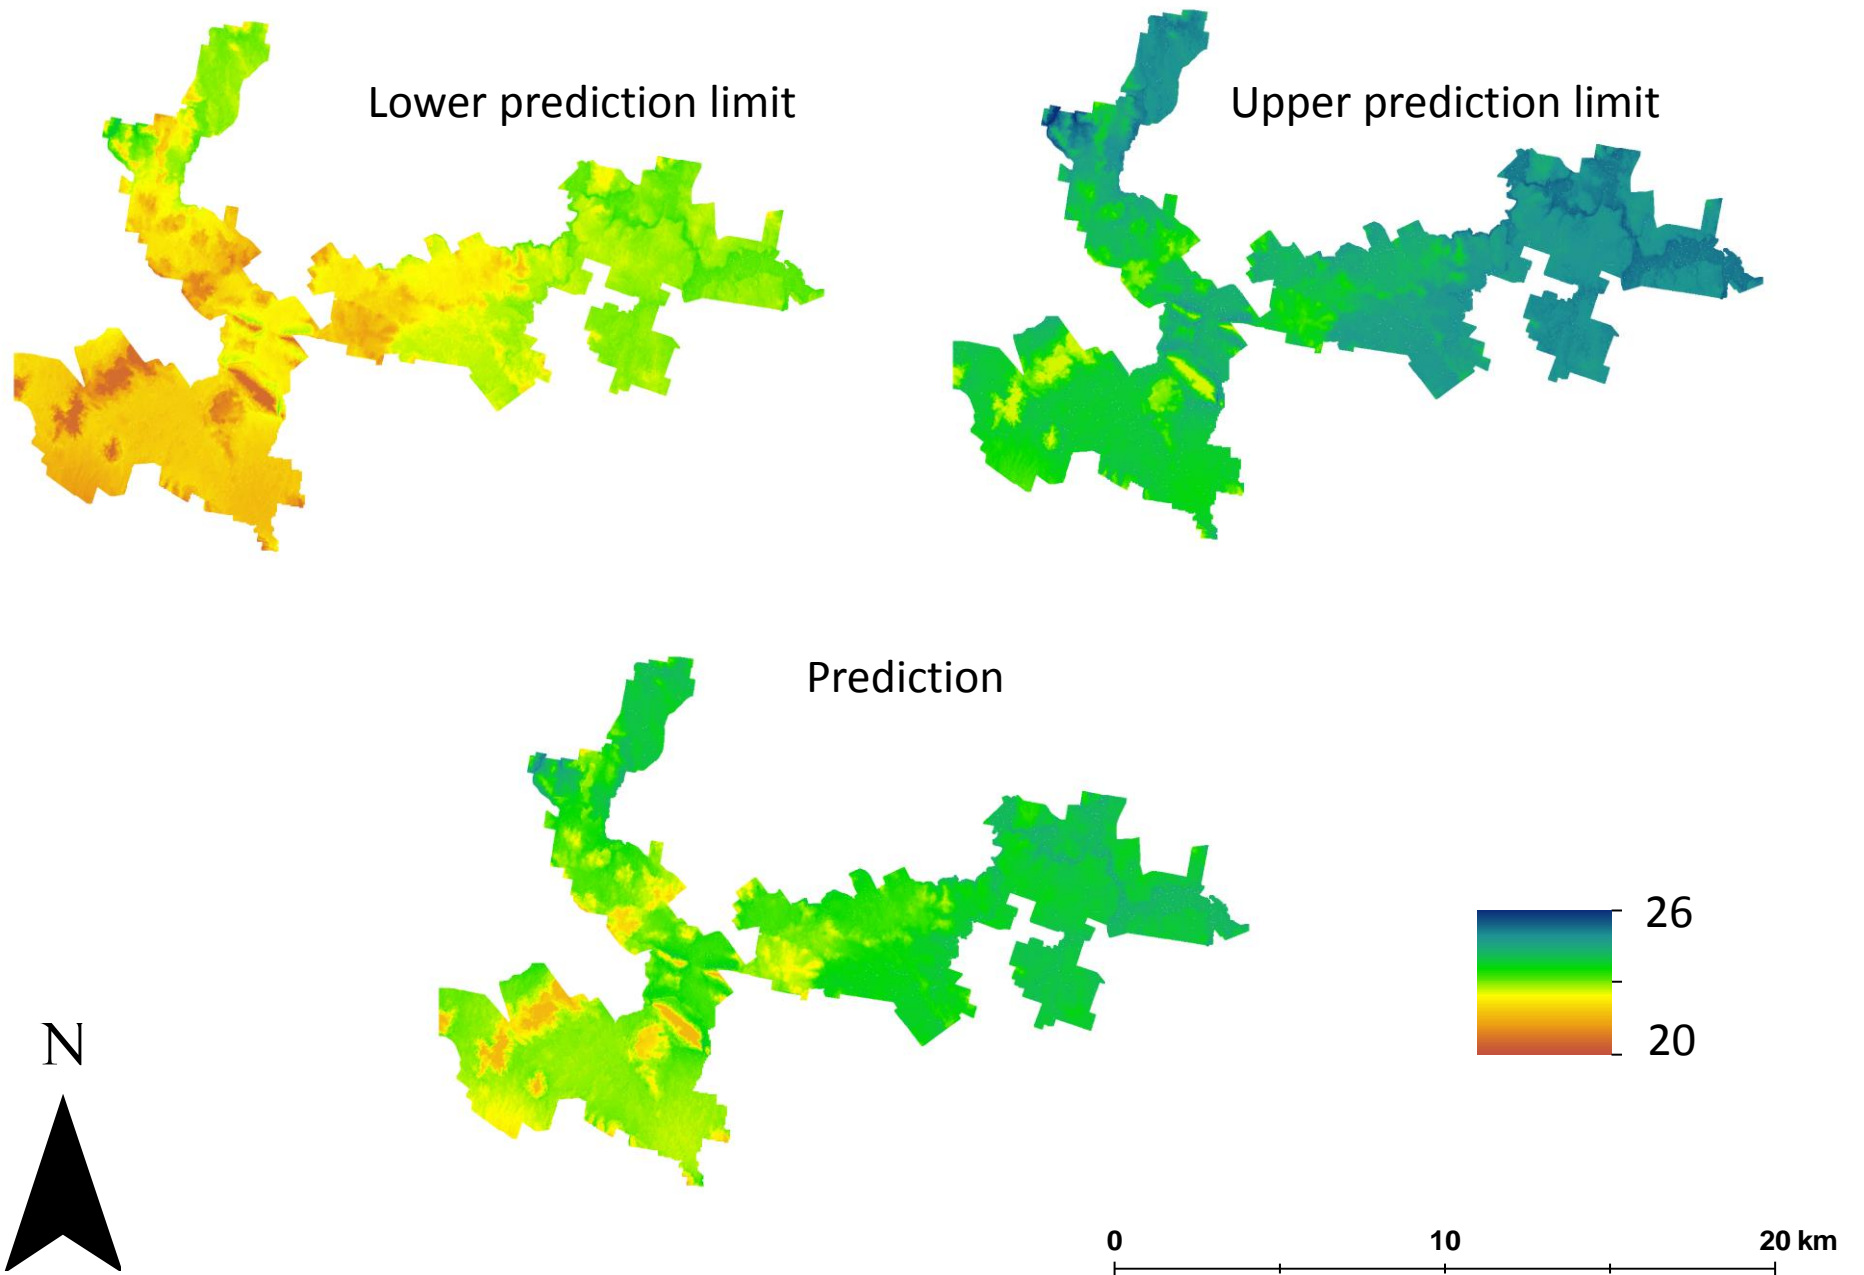

# Land suitability assessment inputs for Hazelnuts: Meander Valley, Tasmania

## Rainfall (mean rainfall for March)

Lower prediction limit

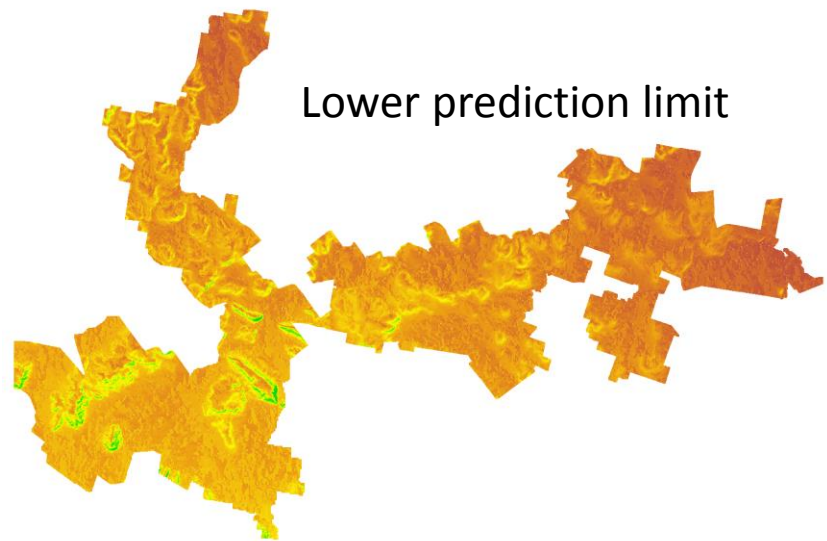

Upper prediction limit

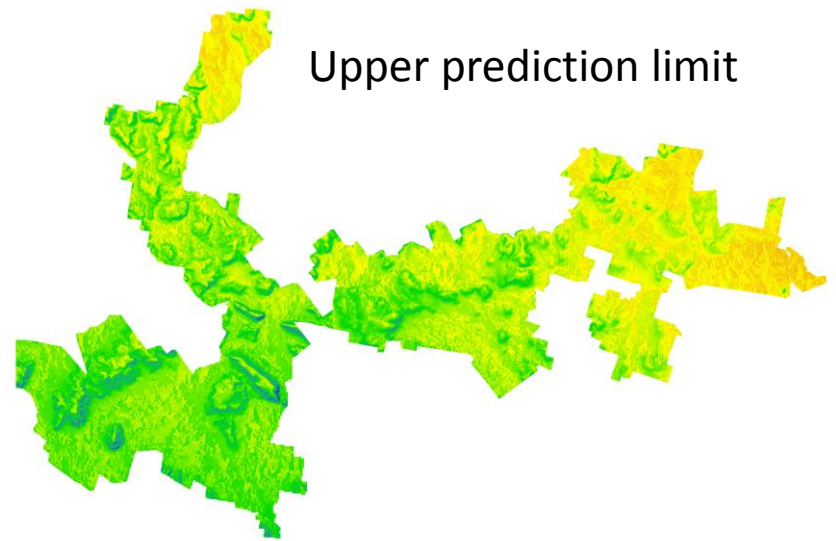

Prediction

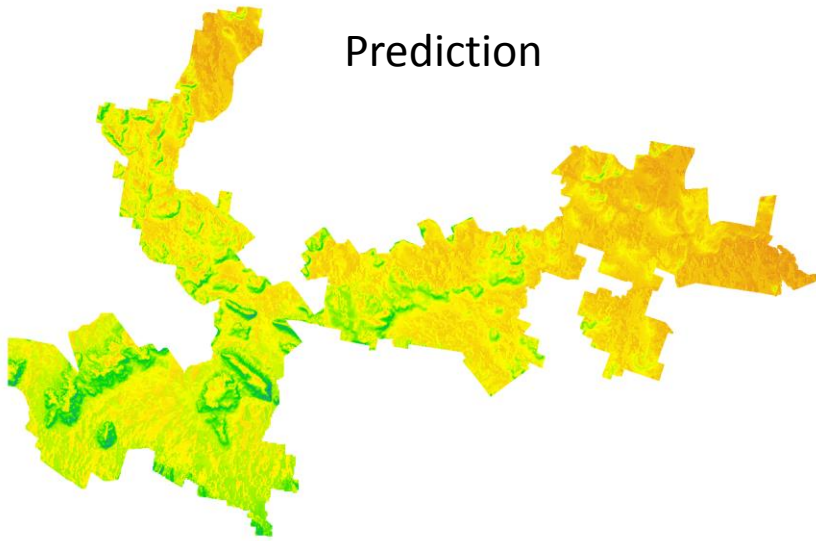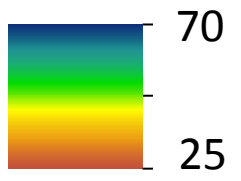

# Land suitability assessment inputs for Hazelnuts: Meander Valley, Tasmania

## Chill hours (April-August inclusive)

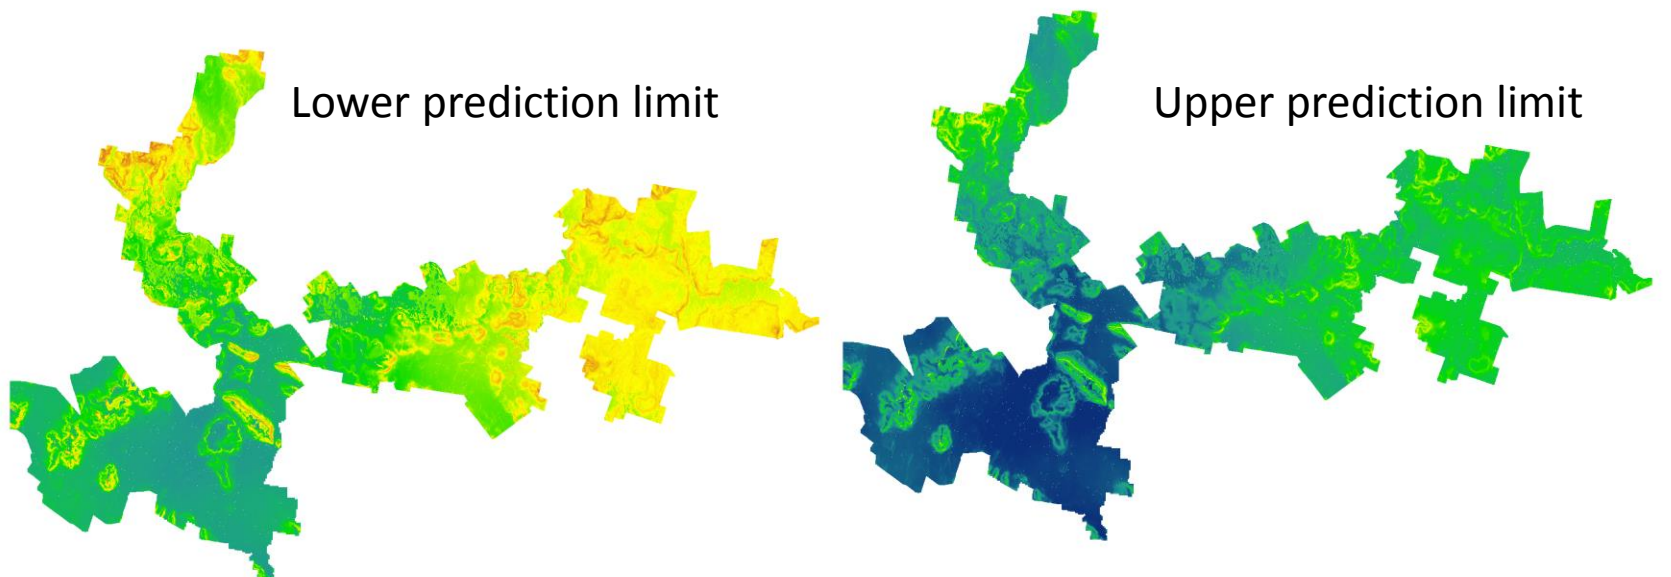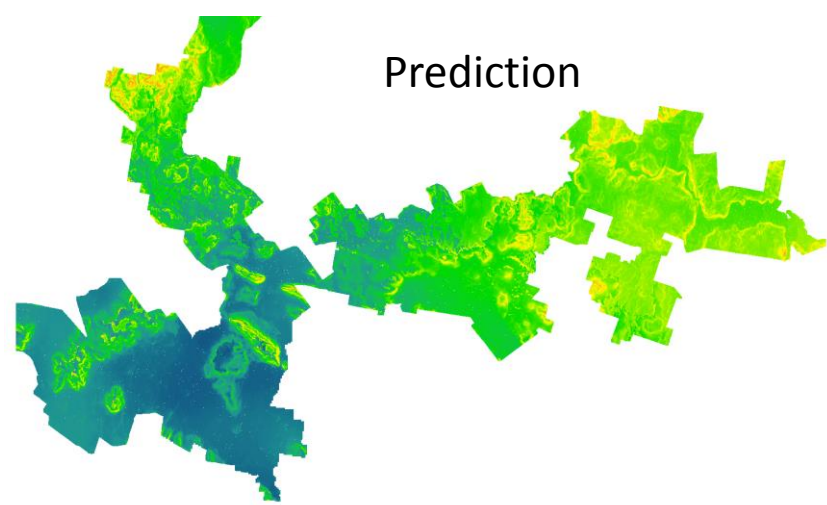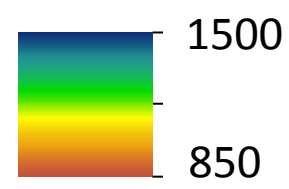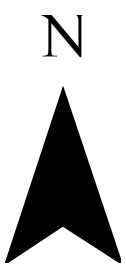

Supplement: tasSuit_supplementaryMaterial1.pdf [file tasSuit_supplementaryMaterial1.pdf]
